# Supplementary material
Source: publisher site journal article supplement (https://www.dovepress.com/article/293677)
Supplement: Supplementary file 1 [file get_supplementary_file.php]

**Supplementary Table 1** Surgical procedures in 78 OCCC patients with II-IV stage

| Surgical procedure | N (%) |
| --- | --- |
| Hysterectomy | 65(83.0) |
| BSO/MSO | 75(96.2) |
| Omentectomy | 70(89.7) |

| Appendicectomy | 61(78.2) |
| --- | --- |
| Pelvic lymph node dissection | 53(67.9) |
| Para-aortic lymph node dissection | 23(29.5) |
| Hepato-coeliac lymphadenectomy | 2(2.6) |
| Splenectomy | 5(6.4) |
| Partial cystectomy | 4(5.1) |
| Ureteroneocystostomy | 1(1.3) |
| Gastric resection | 2(2.6) |
| Pancreas resection | 1(1.3) |
| Liver resection | 7(9.0) |
| Cholecistectomy | 3(3.5) |
| Bowel resection | 6(7.7) |
| Resection of mesentery | 5(6.4) |
| Mesenteric peritonectomy | 25(32.1) |
| Anastomosis | 35(44.9) |
| Colostomy | 4(5.1) |
| Ileostomy | 3(3.8) |
| Parietal/visceral peritonectomy | 50(64.1) |
| Pleurectomy | 12(15.4) |
| Diaphragmatic | 32(41.0) |
